# Supplementary material for: Syn III as a novel regulator of rTMS-induced emotional modulation in the prefrontal cortex under simulated space composite environment
Source: Research Square preprint supplement (doi:10.21203/rs.3.rs-6026592/v1), 2025-05-09
Supplement: Supplementary file 1 [file 722a0fd25f2f9038c4d6d360.pdf]

## Supplementary Fig. 1

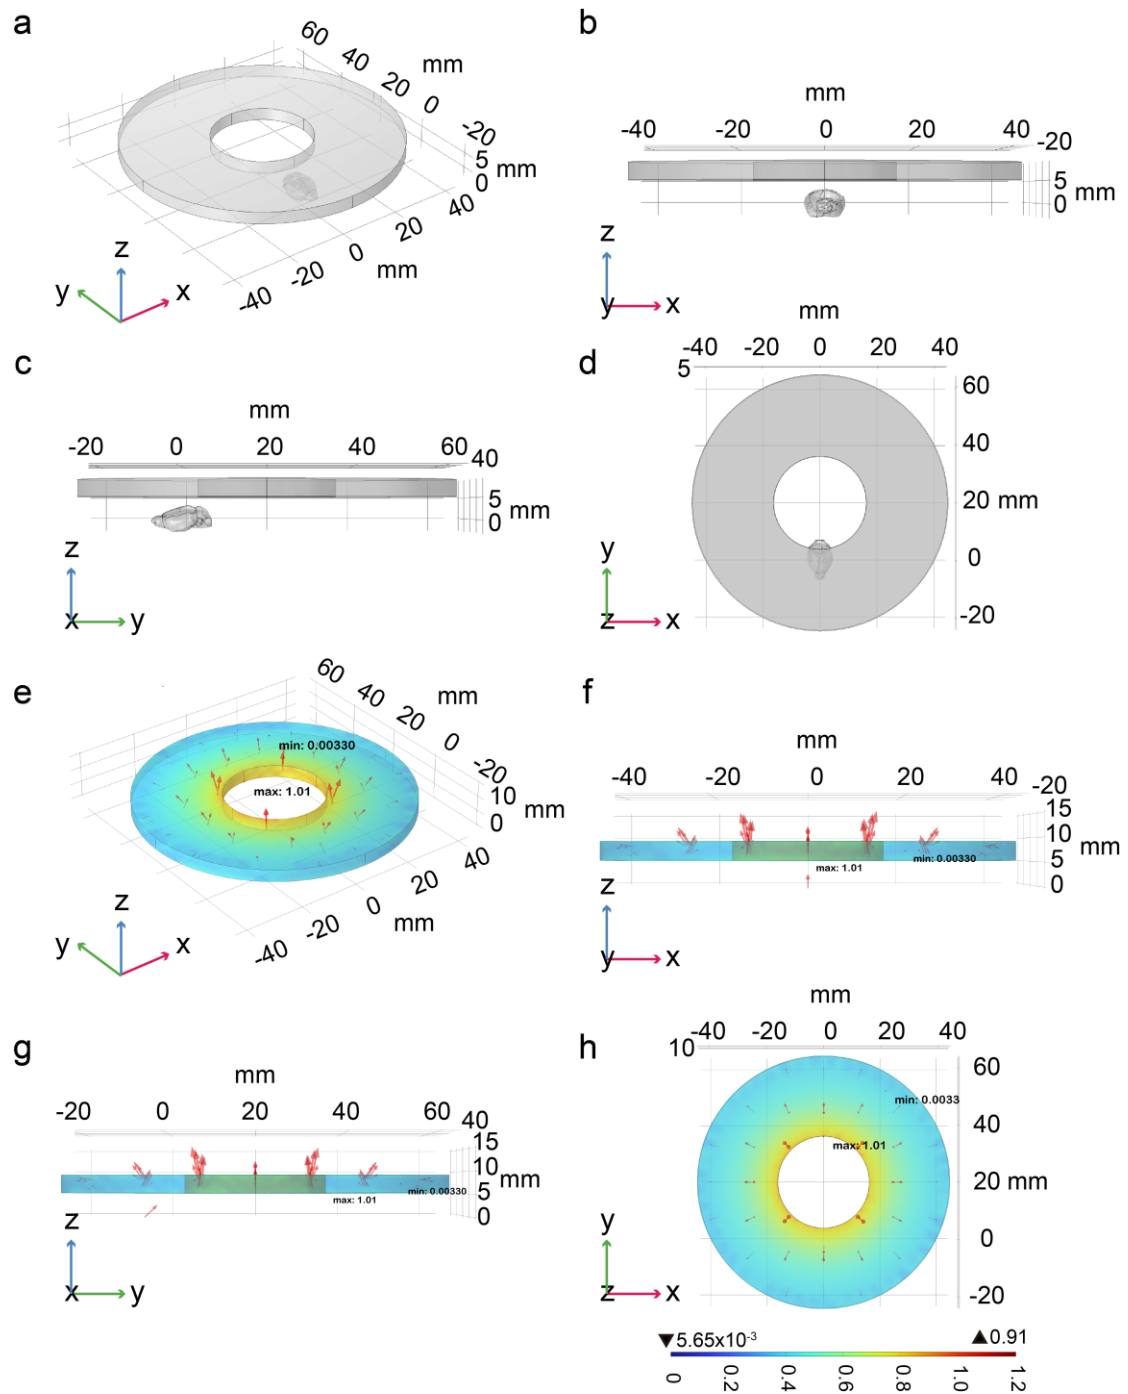

**Fig. S1 Schematic representation of magnetic field simulation.** Relative positioning of the coil and mouse head model (a-d), and the magnetic flux density distribution (e-h).

## Supplementary Fig. 2

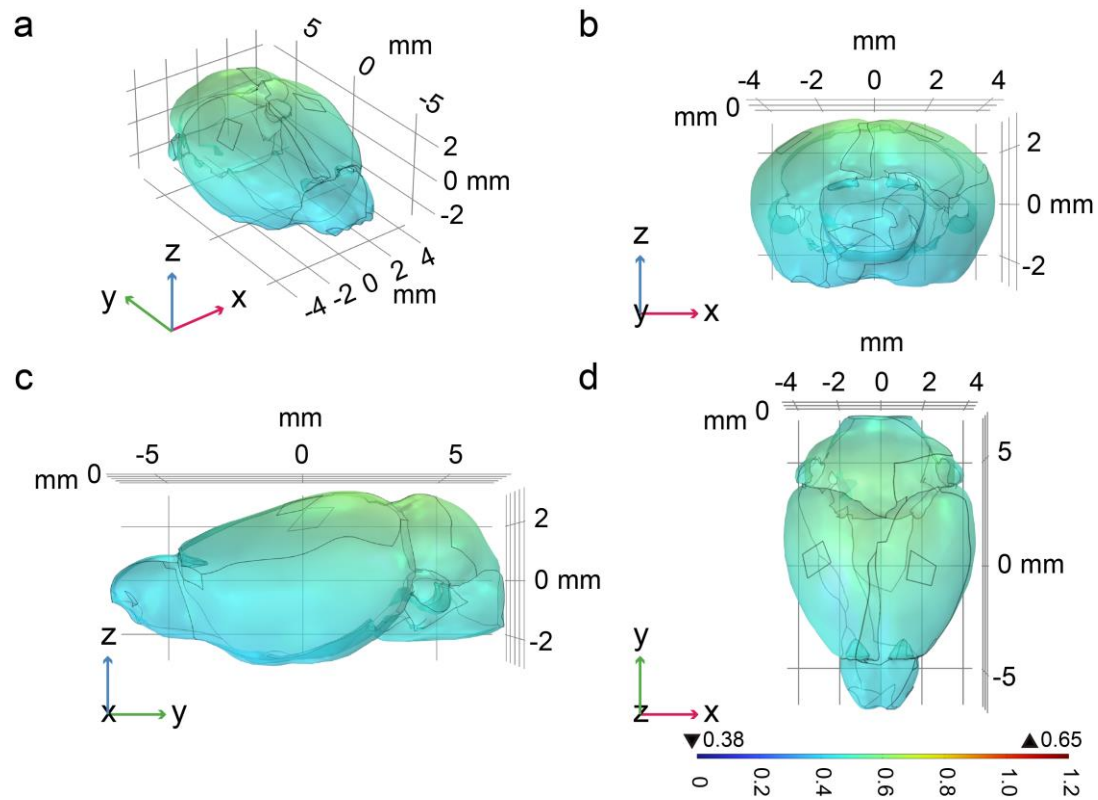

**Fig. S2** Magnetic flux density (a-d) is shown on the anatomically accurate mouse brain model.

Supplementary Fig. 3

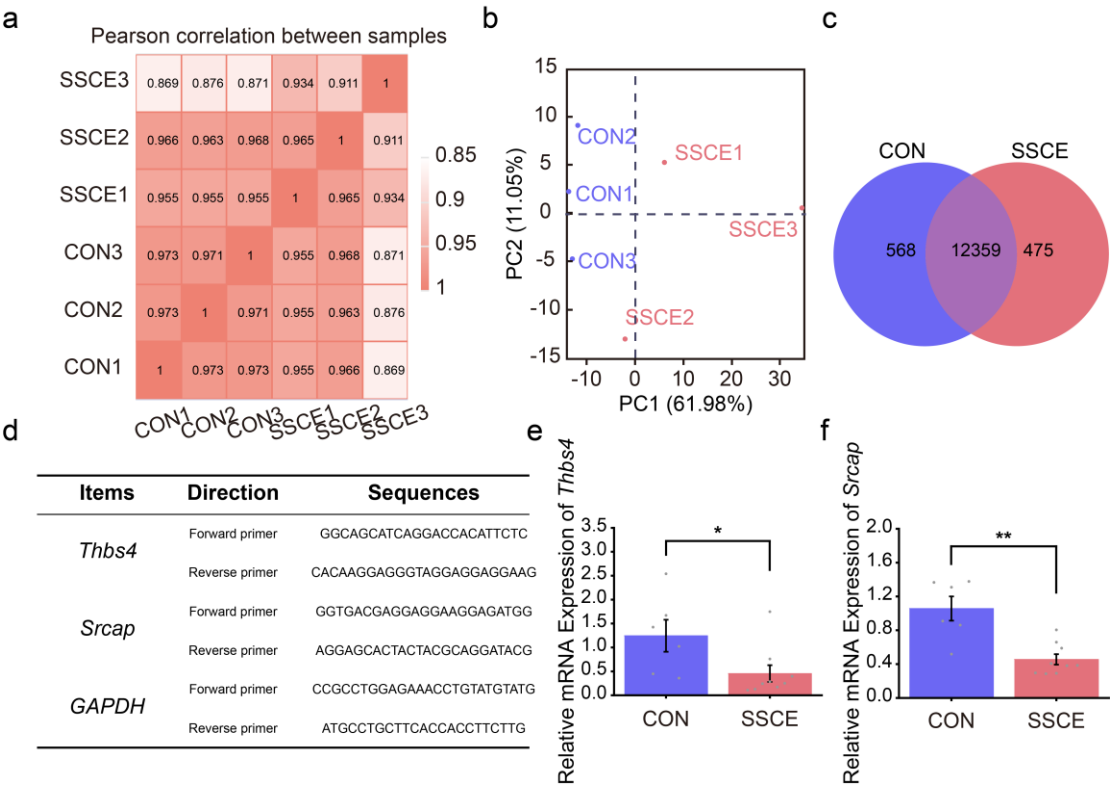

**Fig. S3 DEGs analysis of the prefrontal cortex in mice following short-term of SSCE exposure.**

**a.** Correlation analysis between samples. **b.** Principal component analysis (PCA) of samples. **c.** Venn diagram of co-expressed genes between the CON and SSCE groups. **d.** Primer sequences used for RT-qPCR experiments. **e, f.** Relative expression levels of genes *Thbs4* (**e**) and *Srcap* (**f**) in the PFC of mice after short-term SSCE.

Supplementary Fig. 4

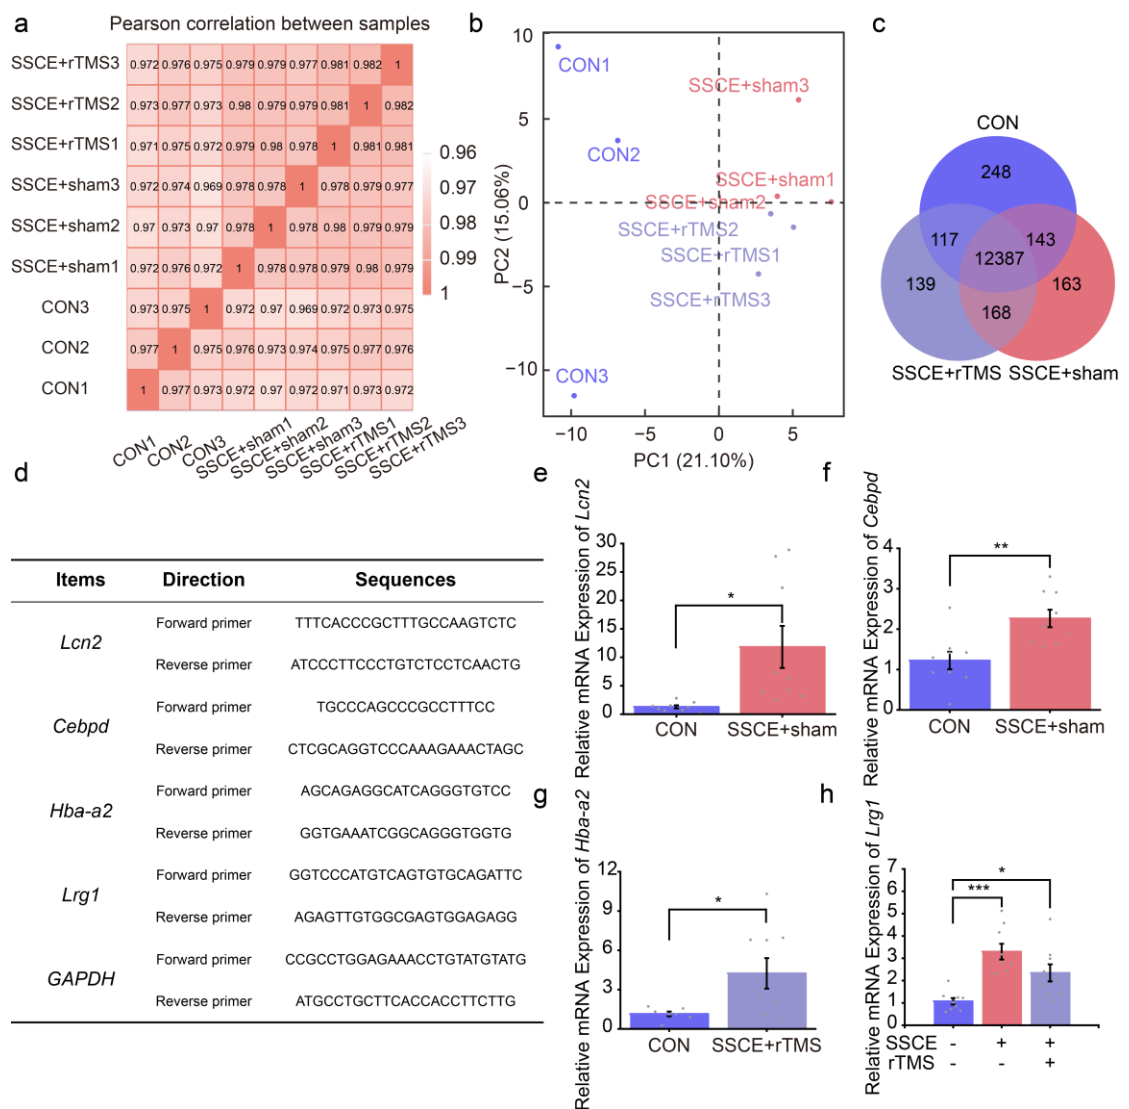

**Fig. S4 DEGs analysis of the prefrontal cortex in mice following long-term of SSCE exposure.**

**a.** Correlation analysis between samples. **b.** Principal component analysis (PCA) of samples. **c.** Venn diagram of co-expressed genes between the CON, SSCE+sham and SSCE+rTMS groups. **d.** Primer sequences used for RT-qPCR experiments. **e-h.** Relative expression levels of genes *Lcn2* (**e**), *Cebpd* (**f**), *Hba-a2* (**g**) and *Lrg1* (**h**) in the PFC of mice after long-term SSCE.

## Supplementary Fig. 5

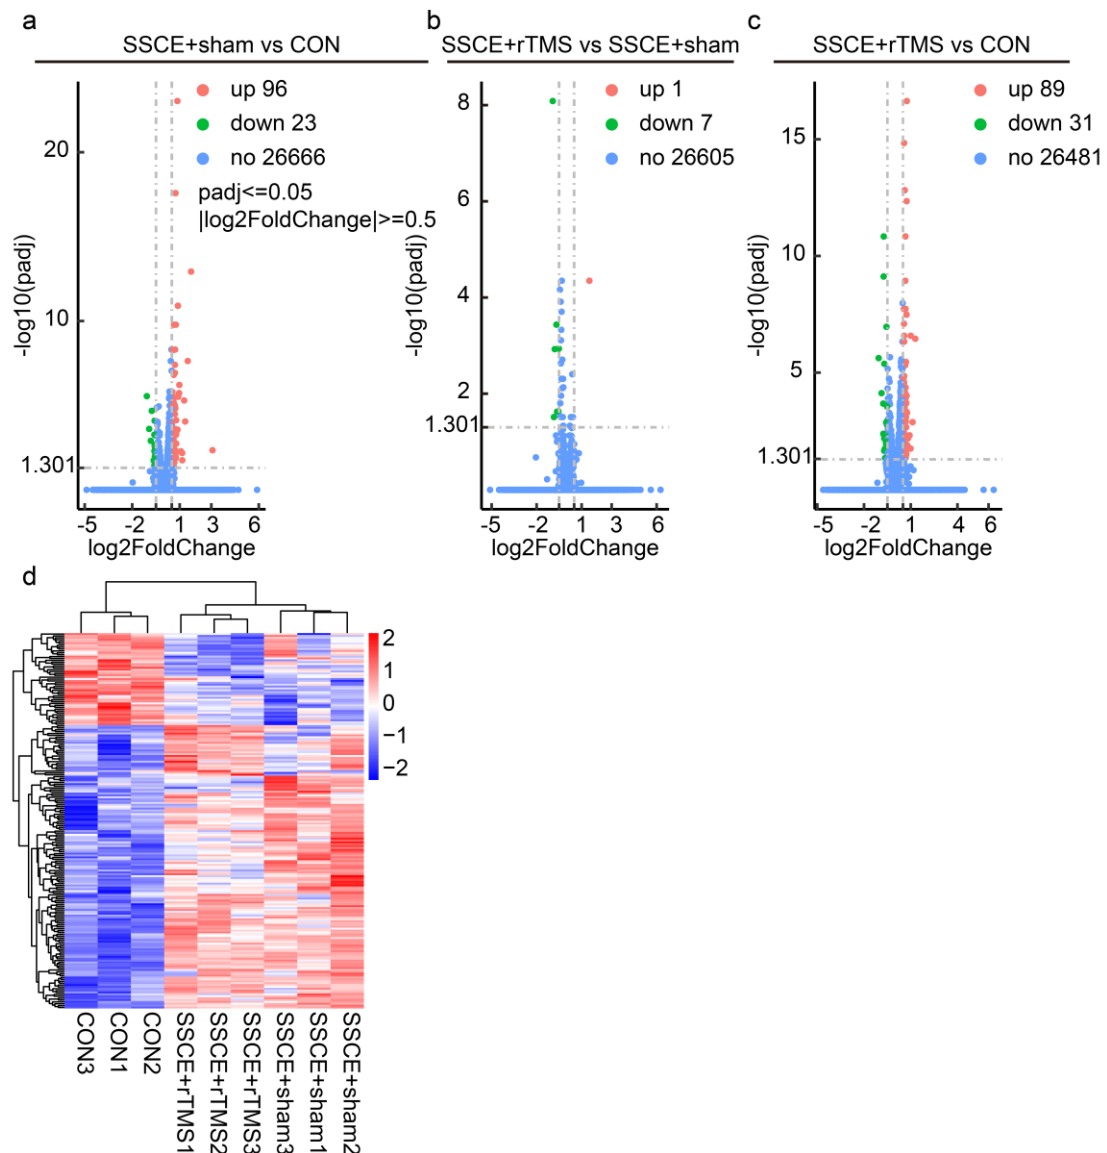

**Fig. S5 RNA-seq analysis of the prefrontal cortex in mice following long-term of SSCE exposure.** **a-c.** Volcano plot for the PFC RNA-seq analysis of mice exposed to long-term SSCE (CON:  $n = 6$  mice, SSCE+sham:  $n = 6$  mice, SSCE+rTMS:  $n = 6$  mice). Differentially expressed genes (DEGs), defined by  $\text{padj} \leq 0.05$ ,  $|\log_2\text{FC}| \geq 0.5$ . FC, foldchange. The complete lists of the RNA-seq analysis and DEGs are provided in **Supplementary Tables 3, 4**. **d.** Hierarchical cluster analysis of DEGs among samples in the CON and SSCE groups exposed to long-term SSCE, respectively (red, up-regulated; blue, down-regulated).

## Supplementary Fig. 6

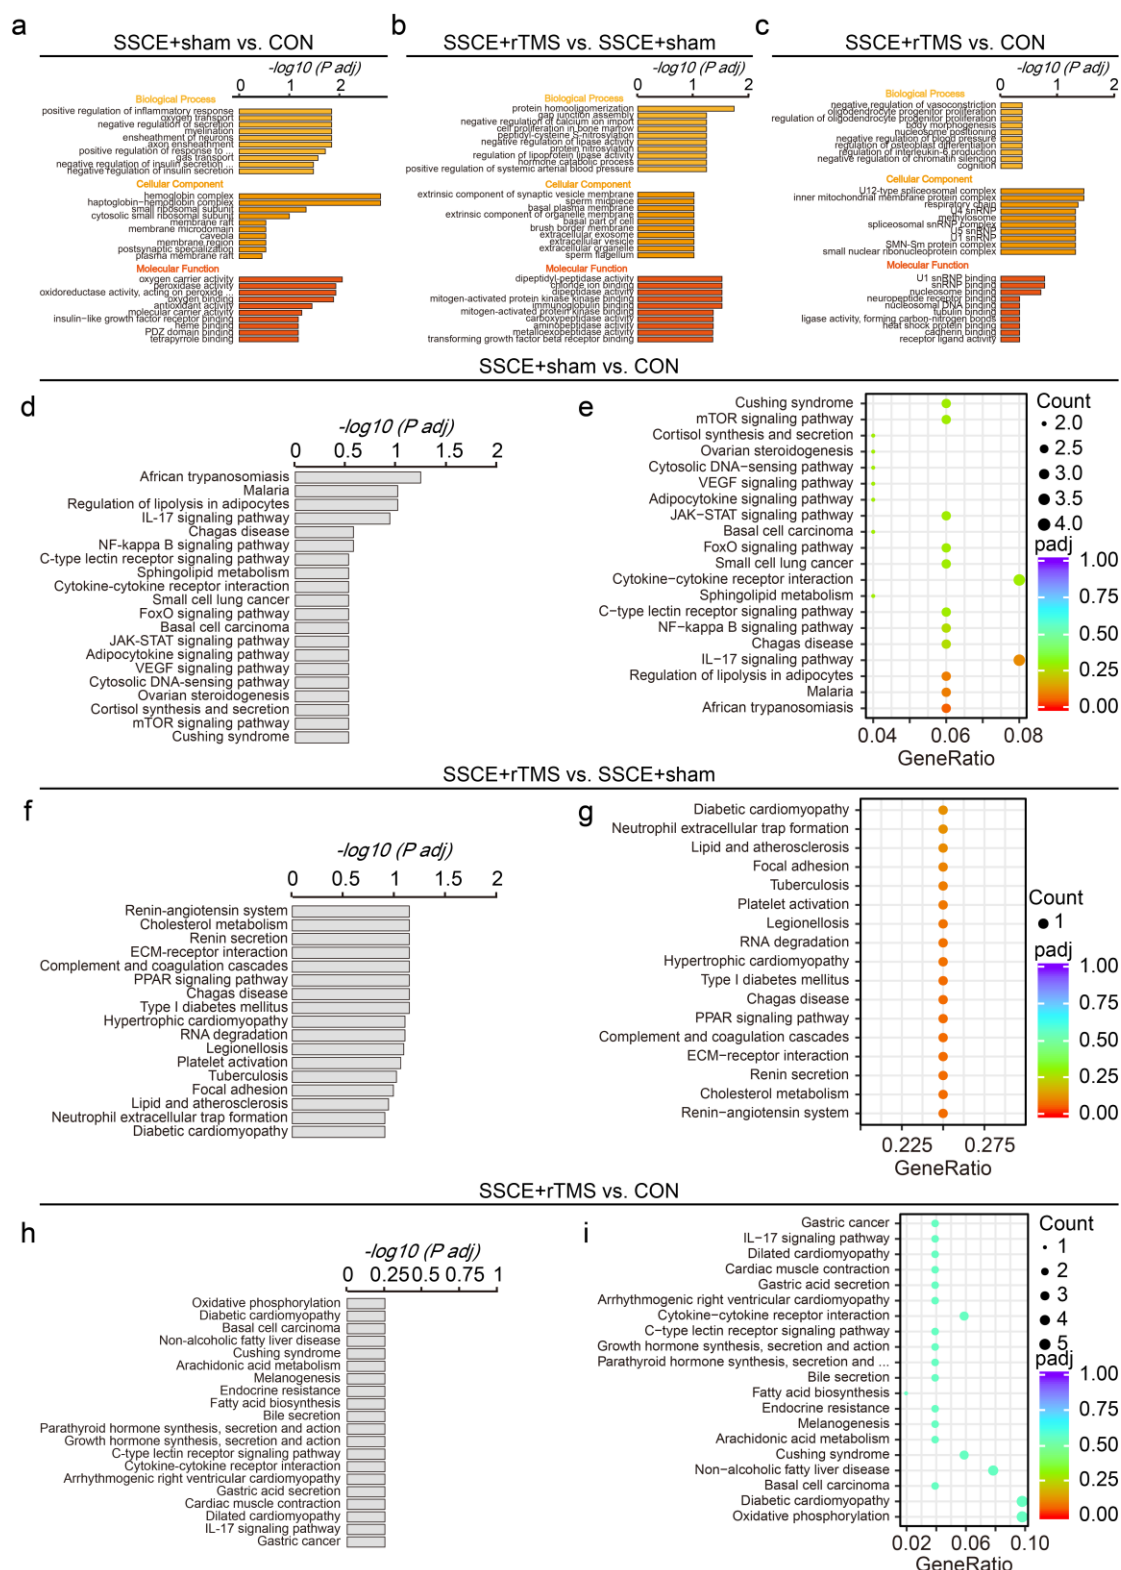

**Fig. S6 GO and KEGG pathway analyses of PFC DEGs in mice exposed to long-term SSCE.**

**a-c.** All significantly enriched GO categories of biological process, cellular component, and molecular function terms between CON, SSCE+sham and SSCE+rTMS groups exposed to long-

term SSCE (**a.** SSCE+sham vs CON, **b.** SSCE+rTMS vs SSCE+sham, **c.** SSCE+rTMS vs CON).  
**d-i.** All significantly enriched KEGG signaling pathways between CON, SSCE+sham and SSCE+rTMS groups exposed to long-term SSCE (**d, e.** SSCE+sham vs CON, **f, g.** SSCE+rTMS vs SSCE+sham, **h, i.** SSCE+rTMS vs CON).

## Supplementary Fig. 7

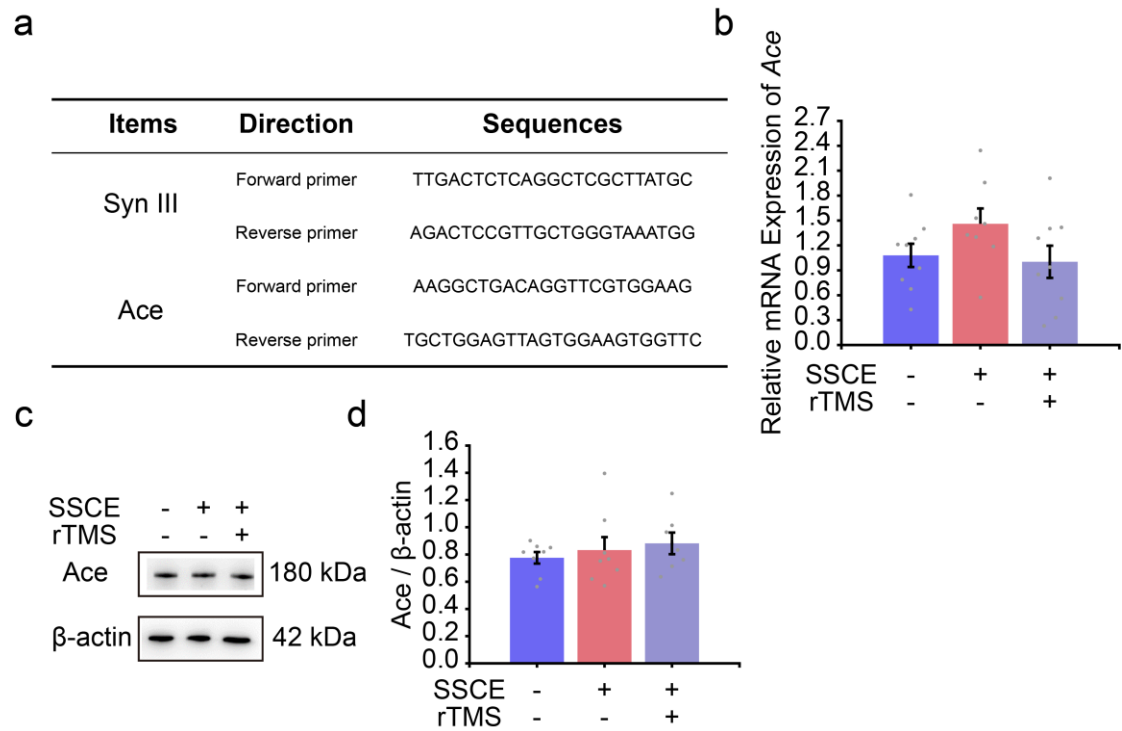

**Fig. S7 Quantitative real-time PCR and Western blot verification for the Ace in the PFC of mice exposed to long-term SSCE in Figure 7. a.** Primer sequences used for RT-qPCR experiments. **b.** Relative expression levels of genes *Ace* in the PFC of mice after long-term SSCE. **c.** Representative western blot bands using total protein extracts from the PFC region. **d.** Quantification of protein expression levels in the PFC among the CON, SSCE+sham and SSCE+rTMS group (from three mice in each group).



## Supplementary Fig. 8

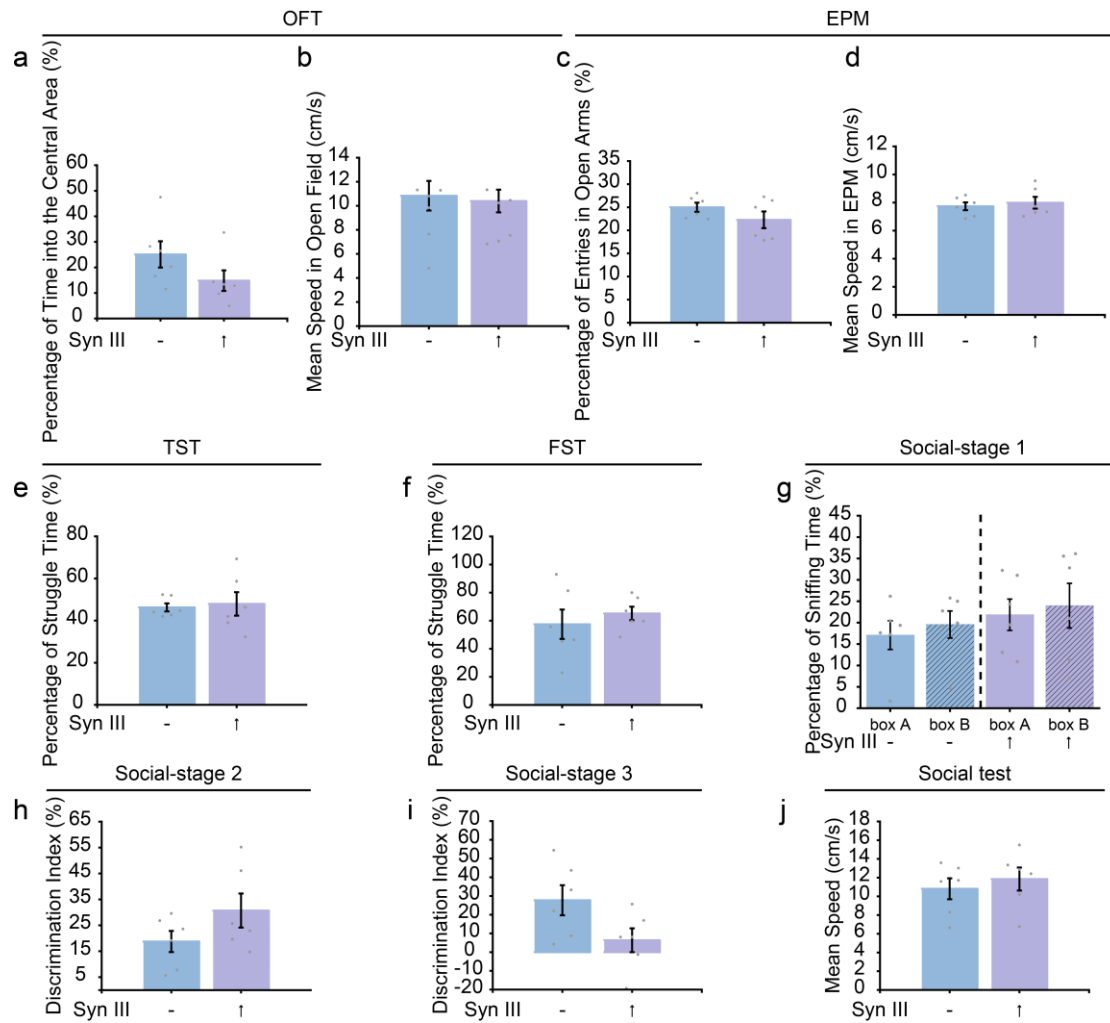

**Fig. S8 Behavioral performance of mice injected with the pcAAV-CMV-Syn3-3xFLAG-P2A-GdGreen-WPRE virus into the mPFC.** **a, b.** The percentage of time spent in the center zone (**a**) and the average speed (**b**) during the OFT, respectively. **c, d.** The percentage of time spent in the open arms (**c**) and the average speed (**d**) during the EPM, respectively. **e, f.** Percentage of time spent struggling during the TST (**e**) and FST (**f**), respectively. **g.** Percentage of time spent sniffing the empty box during Stage 1 of the SDT. **h, i.** The discrimination index during Stage 2 (**h**) and Stage 3 (**i**) of the SDT. **j.** Average speed during the SDT.

## Supplementary Fig. 9

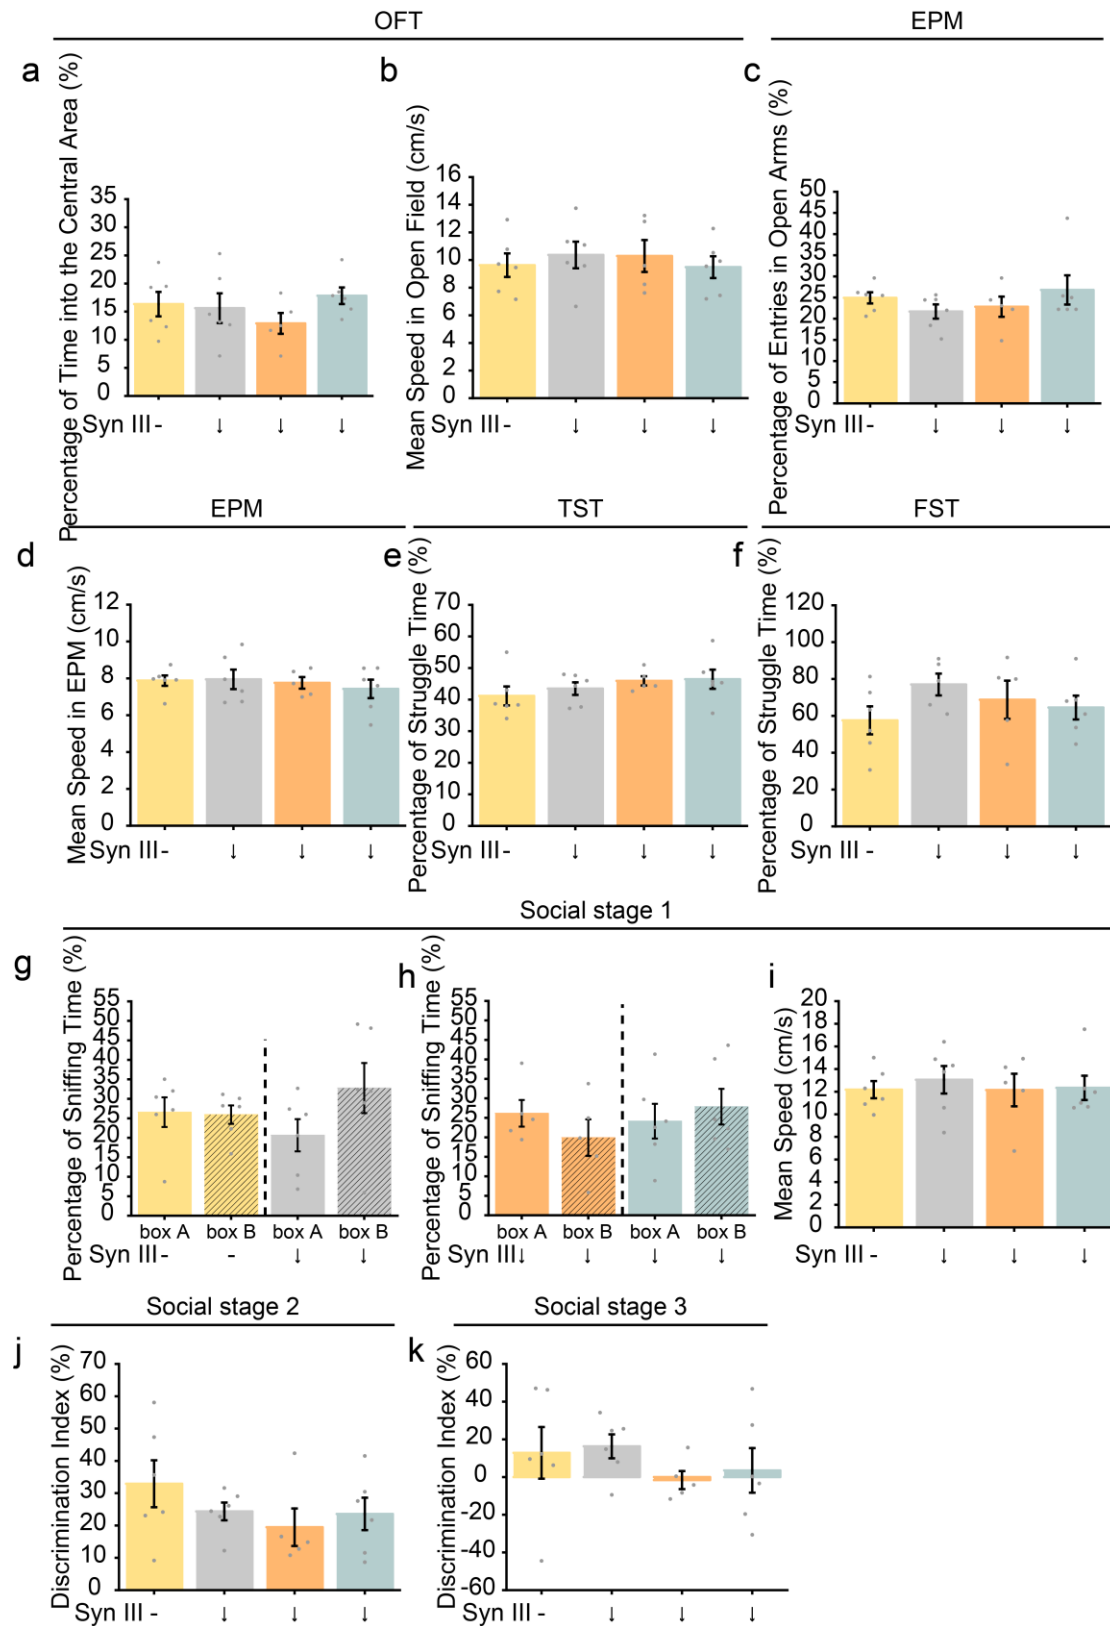

**Fig. S9 Behavioral performance of mice injected with the pAAV-U6-shRNA (Syn3)-CMV-mScarlet-WPRE virus into the mPFC. a, b.** The percentage of time spent in the center zone (a)

and the average speed (**b**) during the OFT, respectively. **c, d**. The percentage of time spent in the open arms (**c**) and the average speed (**d**) during the EPM, respectively. **e, f**. Percentage of time spent struggling during the TST (**e**) and FST (**f**), respectively. **g, h**. Percentage of time spent sniffing the empty box during Stage 1 of the SDT. **j, k**. The discrimination index during Stage 2 (**j**) and Stage 3 (**k**) of the SDT. **i**. Average speed during the SDT.

## Supplementary Fig. 10

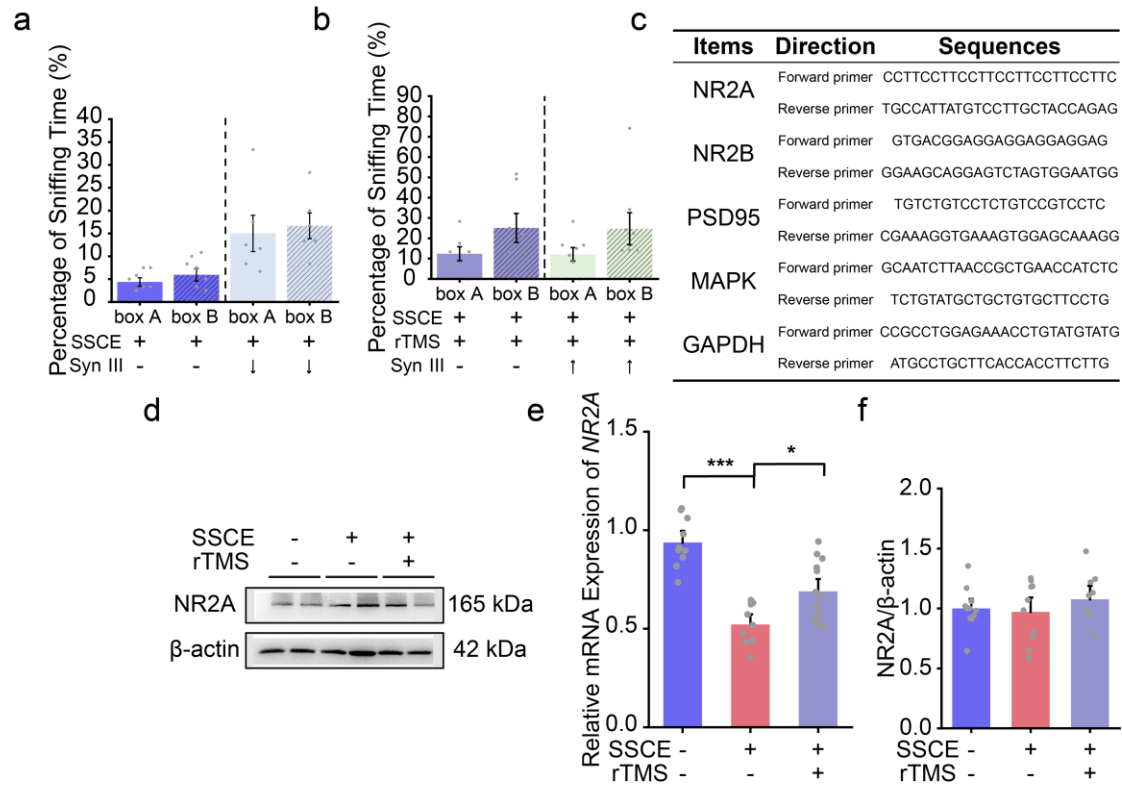

**Fig. S10 Behavioral performance during the SDT and molecular expression validation.** **a, b.** Percentage of time spent sniffing the empty box during Stage 1 of the SDT. **c.** Primer sequences used for RT-qPCR experiments. **d.** Representative western blot bands using total protein extracts from the PFC region. **e.** Relative expression levels of genes *NR2A* in the PFC of mice after long-term SSCE. **f.** Quantification of protein expression levels in the PFC among the CON, SSCE+sham and SSCE+rTMS group (from three mice in each group).

**Supplementary Table. 1**

| <b>Isocortex</b> |           |           |                |
|------------------|-----------|-----------|----------------|
| <b>Region</b>    | <b>t</b>  | <b>df</b> | <b>p value</b> |
| <b>FRP</b>       | 0.4177    | 4         | 0.6976         |
| <b>MOs</b>       | 1.261     | 4         | 0.2759         |
| <b>MOp</b>       | 1.152     | 4         | 0.3136         |
| <b>SSs</b>       | 0.2604    | 4         | 0.8074         |
| <b>SSp</b>       | 0.06931   | 4         | 0.9481         |
| <b>GU</b>        | 1.338     | 4         | 0.2518         |
| <b>VISC</b>      | 0.4232    | 4         | 0.6939         |
| <b>AUD</b>       | 0.8802    | 4         | 0.4285         |
| <b>ACA</b>       | 0.316     | 4         | 0.7678         |
| <b>PL</b>        | 5.209     | 4         | 0.0065         |
| <b>ILA</b>       | 1.409     | 4         | 0.2315         |
| <b>ORB</b>       | 5.434     | 4         | 0.0056         |
| <b>AI</b>        | 0.3646    | 4         | 0.7339         |
| <b>RSP</b>       | 0.41      | 4         | 0.7028         |
| <b>PTLp</b>      | 0.2188    | 4         | 0.8375         |
| <b>TEa</b>       | 0.3907    | 4         | 0.7159         |
| <b>PERI</b>      | 0.4357    | 4         | 0.6855         |
| <b>ECT</b>       | 0.5447    | 4         | 0.6149         |
| <b>OLF</b>       |           |           |                |
| <b>Region</b>    | <b>t</b>  | <b>df</b> | <b>p value</b> |
| <b>AOB</b>       | 0.1144    | 4         | 0.9144         |
| <b>AON</b>       | 6.843     | 4         | 0.0024         |
| <b>COA</b>       | 0.2521    | 4         | 0.8134         |
| <b>DP</b>        | 2.189     | 4         | 0.0938         |
| <b>MOB</b>       | 23.99     | 4         | <0.0001        |
| <b>NLOT</b>      | 0.0006482 | 4         | 0.9995         |
| <b>PAA</b>       | 0.4664    | 4         | 0.6652         |
| <b>PIR</b>       | 2.078     | 4         | 0.1062         |
| <b>TR</b>        | 18.23     | 4         | <0.0001        |
| <b>TT</b>        | 0.7228    | 4         | 0.5098         |
| <b>HPF</b>       |           |           |                |
| <b>Region</b>    | <b>t</b>  | <b>df</b> | <b>p value</b> |
| <b>APr</b>       | 2.508     | 4         | 0.0662         |
| <b>CA</b>        | 0.0546    | 4         | 0.9591         |
| <b>DG</b>        | 0.9513    | 4         | 0.3953         |
| <b>ENT</b>       | 0.2511    | 4         | 0.8141         |
| <b>FC</b>        | 1.809     | 4         | 0.1447         |
| <b>HATA</b>      | 0.8442    | 4         | 0.4461         |
| <b>IG</b>        | 0.3691    | 4         | 0.7308         |

|               |          |           |                |
|---------------|----------|-----------|----------------|
| <b>PAR</b>    | 1.184    | 4         | 0.3018         |
| <b>POST</b>   | 0.07197  | 4         | 0.9461         |
| <b>PRE</b>    | 2.89     | 4         | 0.0446         |
| <b>ProS</b>   | 0.3032   | 4         | 0.7768         |
| <b>SUB</b>    | 1.709    | 4         | 0.1627         |
| <b>CTXsp</b>  |          |           |                |
| <b>Region</b> | <b>t</b> | <b>df</b> | <b>p value</b> |
| <b>BLA</b>    | 0.4007   | 4         | 0.7091         |
| <b>BMA</b>    | 0.1144   | 4         | 0.9144         |
| <b>CLA</b>    | 0.2664   | 4         | 0.8031         |
| <b>EP</b>     | 2.912    | 4         | 0.0436         |
| <b>LA</b>     | 2.281    | 4         | 0.0847         |
| <b>PA</b>     | 4.285    | 4         | 0.0128         |
| <b>STR</b>    |          |           |                |
| <b>Region</b> | <b>t</b> | <b>df</b> | <b>p value</b> |
| <b>CP</b>     | 0.596    | 4         | 0.5833         |
| <b>AAA</b>    | 0.1623   | 4         | 0.879          |
| <b>ACB</b>    | 0.07455  | 4         | 0.9442         |
| <b>CEA</b>    | 0.7631   | 4         | 0.4879         |
| <b>FS</b>     | 0.8725   | 4         | 0.4322         |
| <b>IA</b>     | 1.053    | 4         | 0.3517         |
| <b>LS</b>     | 0.4668   | 4         | 0.6649         |
| <b>MEA</b>    | 0.4712   | 4         | 0.662          |
| <b>OT</b>     | 0.6031   | 4         | 0.579          |
| <b>SF</b>     | 0.9819   | 4         | 0.3818         |
| <b>PAL</b>    |          |           |                |
| <b>Region</b> | <b>t</b> | <b>df</b> | <b>p value</b> |
| <b>BST</b>    | 0.5524   | 4         | 0.6101         |
| <b>PALd</b>   | 0.2416   | 4         | 0.821          |
| <b>SI</b>     | 0.7534   | 4         | 0.4931         |
| <b>HY</b>     |          |           |                |
| <b>Region</b> | <b>t</b> | <b>df</b> | <b>p value</b> |
| <b>LZ</b>     | 2.938    | 4         | 0.0425         |
| <b>MEZ</b>    | 6.858    | 4         | 0.0024         |
| <b>PVR</b>    | 5.428    | 4         | 0.0056         |
| <b>PVZ</b>    | 0.6275   | 4         | 0.5644         |
| <b>TH</b>     |          |           |                |
| <b>Region</b> | <b>t</b> | <b>df</b> | <b>p value</b> |
| <b>ATN</b>    | 0.1119   | 4         | 0.9163         |
| <b>EPI</b>    | 1.007    | 4         | 0.3708         |
| <b>GENd</b>   | 1.849    | 4         | 0.1381         |
| <b>GENv</b>   | 7.492    | 4         | 0.0017         |
| <b>ILM</b>    | 0.7218   | 4         | 0.5103         |

|               |          |           |                |
|---------------|----------|-----------|----------------|
| <b>LAT</b>    | 1.843    | 4         | 0.1391         |
| <b>MED</b>    | 0.634    | 4         | 0.5605         |
| <b>MTN</b>    | 0.0671   | 4         | 0.9497         |
| <b>RT</b>     | 1.248    | 4         | 0.28           |
| <b>SPF</b>    | 2.081    | 4         | 0.106          |
| <b>VENT</b>   | 0.9512   | 4         | 0.3954         |
| <b>MB</b>     |          |           |                |
| <b>Region</b> | <b>t</b> | <b>df</b> | <b>p value</b> |
| <b>MBmot</b>  | 1.199    | 4         | 0.2967         |
| <b>MBsen</b>  | 3.489    | 4         | 0.0251         |
| <b>MBsta</b>  | 2.405    | 4         | 0.074          |
| <b>HB</b>     |          |           |                |
| <b>Region</b> | <b>t</b> | <b>df</b> | <b>p value</b> |
| <b>MY-mot</b> | 1.075    | 4         | 0.3429         |
| <b>MY-sat</b> | 5.076    | 4         | 0.0071         |
| <b>MY-sen</b> | 2.334    | 4         | 0.0799         |
| <b>P-mot</b>  | 4.07     | 4         | 0.0152         |
| <b>P-sat</b>  | 0.3226   | 4         | 0.7632         |
| <b>P-sen</b>  | 1.791    | 4         | 0.1477         |
| <b>CB</b>     |          |           |                |
| <b>Region</b> | <b>t</b> | <b>df</b> | <b>p value</b> |
| <b>CBN</b>    | 0.367    | 4         | 0.7322         |
| <b>CBX</b>    | 0.6265   | 4         | 0.565          |

## Supplementary Table. 2, 3

Table S2 The total RNA detection information for the PFC region after two weeks of SSCE.

| Sample ID | Concentration (ng/ul) | Volume (ul) | Total amount (ug) | Integrity value | Conclusion |
|-----------|-----------------------|-------------|-------------------|-----------------|------------|
| CON1      | 121.00                | 35.00       | 4.235             | 7.00            | pass       |
| CON2      | 31.00                 | 35.00       | 1.085             | 6.70            | pass       |
| CON3      | 171.00                | 35.00       | 5.985             | 7.80            | pass       |
| SSCE1     | 238.00                | 35.00       | 8.330             | 8.30            | pass       |
| SSCE2     | 191.00                | 35.00       | 6.685             | 7.80            | pass       |
| SSCE3     | 96.00                 | 35.00       | 3.360             | 7.90            | pass       |

Table S3 Evaluation and statistics of RNA sequencing valid data after two weeks of SSCE.

| Sample ID | Raw Reads | Clean Reads | Clean Ratio | GC content | Mapping Ratio |
|-----------|-----------|-------------|-------------|------------|---------------|
| CON1      | 43847738  | 41321266    | 94.24%      | 48.70%     | 96.11%        |
| CON2      | 45842460  | 42511298    | 92.73%      | 48.23%     | 96.0%         |
| CON3      | 44218322  | 41111864    | 92.97%      | 48.53%     | 96.42%        |
| SSCE1     | 40859454  | 37822860    | 92.57%      | 48.61%     | 95.12%        |
| SSCE2     | 46217266  | 43541708    | 94.21%      | 49.55%     | 95.59%        |
| SSCE3     | 45691830  | 42850474    | 93.78%      | 49.63%     | 94.3%         |



## Supplementary Table. 4, 5

Table S4 The total RNA detection information for the PFC region after four weeks of SSCE.

| Sample ID  | Concentration (ng/ul) | Volume (ul) | Total amount (ug) | Integrity value | Conclusion |
|------------|-----------------------|-------------|-------------------|-----------------|------------|
| CON1       | 567.00                | 35.00       | 19.845            | 7.60            | pass       |
| CON2       | 495.00                | 35.00       | 17.325            | 7.80            | pass       |
| CON3       | 376.00                | 35.00       | 13.160            | 8.00            | pass       |
| SSCE+sham1 | 644.00                | 35.00       | 22.540            | 7.90            | pass       |
| SSCE+sham2 | 588.00                | 35.00       | 20.580            | 8.30            | pass       |
| SSCE+sham3 | 522.00                | 35.00       | 18.270            | 8.10            | pass       |
| SSCE+rTMS1 | 825.00                | 35.00       | 28.875            | 8.10            | pass       |
| SSCE+rTMS2 | 578.00                | 35.00       | 20.230            | 8.50            | pass       |
| SSCE+rTMS3 | 488.00                | 35.00       | 17.080            | 7.90            | pass       |

Table S5 Evaluation and statistics of RNA sequencing valid data after four weeks of SSCE.

| Sample ID  | Raw Reads | Clean Reads | Clean Ratio | GC content | Mapping Ratio |
|------------|-----------|-------------|-------------|------------|---------------|
| CON1       | 45026542  | 43213944    | 95.97%      | 48.23%     | 96.59%        |
| CON2       | 45446802  | 44256808    | 97.38%      | 48.44%     | 96.87%        |
| CON3       | 45116404  | 43386640    | 96.17%      | 47.94%     | 96.52%        |
| SSCE+sham1 | 44111382  | 41581056    | 94.26%      | 49.32%     | 96.33%        |
| SSCE+sham2 | 41896984  | 39897884    | 95.23%      | 49.78%     | 96.14%        |
| SSCE+sham3 | 45371310  | 43605772    | 96.11%      | 49.77%     | 96.29%        |
| SSCE+rTMS1 | 45275668  | 43552104    | 96.19%      | 49.69%     | 96.17%        |
| SSCE+rTMS2 | 45378108  | 43298678    | 95.42%      | 49.4%      | 96.43%        |
| SSCE+rTMS3 | 44116184  | 41925346    | 95.03%      | 49.25%     | 96.07%        |
